# Supplementary material for: Development of an anisotropic polarizable model for the all-atom AMOEBA force field
Source: Royal Society of Chemistry journal article supplement (doi:10.1039/d4cp01568a), 2024-01-01
Supplement: d4cp01568a1.pdf [file d4cp01568a1.pdf]

## Development of anisotropic polarizable model for all-atom AMOEBA force fields

Yanyan Yang, Qianqian Jing and Shiwei Yin\*

Key Laboratory for Macromolecular Science of Shaanxi Province, School of Chemistry and Chemical Engineering, Shaanxi Normal University, Xi'an City 710119, People's Republic of China

### Contents

|                                                                                                                                                                                                                                                                                                                        |   |
|------------------------------------------------------------------------------------------------------------------------------------------------------------------------------------------------------------------------------------------------------------------------------------------------------------------------|---|
| Table S.1 Lattice parameters of refined experimental crystal structures optimized by three-type force fields. The units of lattice lengths $a$ , $b$ and $c$ , packing similarity (RMSD <sub>20</sub> ) and crystal similarity (t-RMSD) are in Å and lattice angles of $\alpha$ $\beta$ and $\gamma$ in degree(°)..... | 1 |
| Table S.2 The lattice parameters of all matched crystals from USPEX-predicted crystals using ANISO-Polar and ISO-Polar models. The units of lattice lengths, RMSD <sub>20</sub> and t-RMSD are in Å, lattice angles is in degree(°) and the Total energy of unit cell is in kcal/mol. ....                             | 3 |
| Table S.3. The distributed atomic polarizability tensors under the molecular standard coordinates. The unit of atomic polarizability $\alpha$ is in $4\pi\epsilon_0\text{Å}^3$ .....                                                                                                                                   | 4 |
| Table S.4. Energy decomposition analysis on the basis of the optimized experimental crystals using NON-Polar, ISO-Polar and ANISO-Polar models. The unit of energy is in kcal mol <sup>-1</sup> . ....                                                                                                                 | 7 |
| Table S.5 Molecular polarizability of naphthalene and anthracene calculated from different density functionals coupled with 6-311+G(d,p) basis set. (The unit of polarizability $\alpha$ is in $4\pi\epsilon_0\text{Å}^3$ ).....                                                                                       | 8 |

**Table S.1 Lattice parameters of refined experimental crystal structures optimized by three-type force fields. The units of lattice lengths  $a$ ,  $b$  and  $c$ , packing similarity (RMSD<sub>20</sub>) and crystal similarity (t-RMSD) are in Å and lattice angles of  $\alpha$   $\beta$  and  $\gamma$  in degree(°).**

| Models   | Functionals | $a$             | $b$   | $c$   | $A$   | $\beta$ | $\gamma$ | RMSD <sub>20</sub> |      |
|----------|-------------|-----------------|-------|-------|-------|---------|----------|--------------------|------|
| NAPHTA06 |             |                 |       |       |       |         |          |                    |      |
| Exp.     | -           | 5.940           | 7.832 | 8.108 | 90.00 | 114.32  | 90.00    | -                  |      |
|          | PBE         | 6.028           | 7.791 | 8.145 | 90.00 | 115.59  | 90.00    | 0.51               |      |
|          | M06         | 6.067           | 7.798 | 8.023 | 90.00 | 114.65  | 90.00    | 0.50               |      |
|          | NON-Polar   | M06-L           | 6.087 | 7.772 | 8.021 | 90.00   | 114.51   | 90.00              | 0.52 |
|          |             | CAM-B3LYP       | 6.043 | 7.798 | 8.077 | 90.00   | 115.08   | 90.00              | 0.52 |
|          |             | $\omega$ B97X-D | 6.022 | 7.794 | 8.137 | 90.00   | 115.58   | 90.00              | 0.51 |

|             |                 |       |       |       |       |        |       |      |
|-------------|-----------------|-------|-------|-------|-------|--------|-------|------|
|             | B3LYP           | 6.044 | 7.800 | 8.080 | 90.00 | 115.10 | 90.00 | 0.52 |
|             | B2PLYP          | 6.023 | 7.803 | 8.115 | 90.00 | 115.43 | 90.00 | 0.49 |
|             | PBE             | 5.979 | 7.802 | 8.179 | 90.00 | 115.73 | 90.00 | 0.49 |
|             | M06             | 6.026 | 7.809 | 8.032 | 90.00 | 114.60 | 90.00 | 0.43 |
|             | M06-L           | 6.058 | 7.782 | 8.019 | 90.00 | 114.42 | 90.00 | 0.49 |
| ISO-Polar   | CAM-B3LYP       | 5.997 | 7.811 | 8.091 | 90.00 | 115.06 | 90.00 | 0.45 |
|             | $\omega$ B97X-D | 5.973 | 7.801 | 8.159 | 90.00 | 115.59 | 90.00 | 0.48 |
|             | B3LYP           | 6.001 | 7.813 | 8.094 | 90.00 | 115.09 | 90.00 | 0.45 |
|             | B2PLYP          | 5.976 | 7.816 | 8.126 | 90.00 | 115.36 | 90.00 | 0.45 |
|             | PBE             | 5.960 | 7.827 | 8.181 | 90.00 | 115.82 | 90.00 | 0.47 |
|             | M06             | 6.003 | 7.838 | 8.037 | 90.00 | 114.75 | 90.00 | 0.41 |
|             | M06-L           | 6.041 | 7.806 | 8.021 | 90.00 | 114.53 | 90.00 | 0.44 |
| ANISO-Polar | CAM-B3LYP       | 5.975 | 7.840 | 8.095 | 90.00 | 115.20 | 90.00 | 0.42 |
|             | $\omega$ B97X-D | 5.950 | 7.832 | 8.167 | 90.00 | 115.75 | 90.00 | 0.46 |
|             | B3LYP           | 5.980 | 7.840 | 8.098 | 90.00 | 115.22 | 90.00 | 0.43 |
|             | B2PLYP          | 5.953 | 7.845 | 8.135 | 90.00 | 115.53 | 90.00 | 0.43 |
| ANTCEN01    |                 |       |       |       |       |        |       |      |
| Exp.        | -               | 6.002 | 8.443 | 9.256 | 90.00 | 102.27 | 90.00 | -    |
|             | PBE             | 6.134 | 8.066 | 9.522 | 90.00 | 103.26 | 90.00 | 0.53 |
|             | M06             | 6.164 | 8.054 | 9.463 | 90.00 | 102.70 | 90.00 | 0.52 |
|             | M06-L           | 6.184 | 8.023 | 9.475 | 90.00 | 102.63 | 90.00 | 0.59 |
| NON-Polar   | CAM-B3LYP       | 6.140 | 8.064 | 9.495 | 90.00 | 103.01 | 90.00 | 0.53 |
|             | $\omega$ B97X-D | 6.122 | 8.070 | 9.519 | 90.00 | 103.26 | 90.00 | 0.52 |
|             | B3LYP           | 6.144 | 8.065 | 9.494 | 90.00 | 103.00 | 90.00 | 0.51 |
|             | B2PLYP          | 6.120 | 8.075 | 9.516 | 90.00 | 103.23 | 90.00 | 0.49 |
|             | PBE             | 6.082 | 8.105 | 9.528 | 90.00 | 103.34 | 90.00 | 0.47 |
|             | M06             | 6.118 | 8.093 | 9.453 | 90.00 | 102.67 | 90.00 | 0.47 |
|             | M06-L           | 6.149 | 8.054 | 9.462 | 90.00 | 102.59 | 90.00 | 0.51 |
| ISO-Polar   | CAM-B3LYP       | 6.089 | 8.106 | 9.486 | 90.00 | 102.98 | 90.00 | 0.45 |
|             | $\omega$ B97X-D | 6.069 | 8.111 | 9.513 | 90.00 | 103.21 | 90.00 | 0.44 |
|             | B3LYP           | 6.097 | 8.105 | 9.489 | 90.00 | 103.01 | 90.00 | 0.46 |
|             | B2PLYP          | 6.067 | 8.119 | 9.506 | 90.00 | 103.18 | 90.00 | 0.43 |
| ANISO-Polar | PBE             | 6.047 | 8.124 | 9.572 | 90.00 | 103.72 | 90.00 | 0.44 |
|             | M06             | 6.078 | 8.128 | 9.482 | 90.00 | 103.00 | 90.00 | 0.42 |

|                 |       |       |       |       |        |       |      |
|-----------------|-------|-------|-------|-------|--------|-------|------|
| M06-L           | 6.121 | 8.082 | 9.481 | 90.00 | 102.85 | 90.00 | 0.49 |
| CAM-B3LYP       | 6.051 | 8.137 | 9.521 | 90.00 | 103.33 | 90.00 | 0.41 |
| $\omega$ B97X-D | 6.030 | 8.139 | 9.557 | 90.00 | 103.61 | 90.00 | 0.41 |
| B3LYP           | 6.061 | 8.130 | 9.525 | 90.00 | 103.35 | 90.00 | 0.43 |
| B2PLYP          | 6.028 | 8.147 | 9.549 | 90.00 | 103.56 | 90.00 | 0.40 |

**Table S.2 The lattice parameters of all matched crystals from USPEX-predicted crystals using ANISO-Polar and ISO-Polar models. The units of lattice lengths , RMSD<sub>20</sub> and t-RMSD are in Å, lattice angles is in degree(°) and the Total energy of unit cell is in kcal/mol.**

| Models      | No.   | a     | b     | c      | $\alpha$ | $\beta$ | $\gamma$ | RMSD <sub>20</sub> | Energy |
|-------------|-------|-------|-------|--------|----------|---------|----------|--------------------|--------|
| NAPHTA06    |       |       |       |        |          |         |          |                    |        |
|             | Exp.  | 5.940 | 7.832 | 8.108  | 90.00    | 114.32  | 90.00    | -                  | -      |
| NON-Polar   | Rank1 | 6.043 | 7.798 | 8.078  | 90.00    | 115.09  | 90.00    | 0.52               | -21.86 |
| ISO-Polar   | Rank2 | 5.997 | 7.810 | 8.091  | 90.00    | 115.06  | 90.00    | 0.45               | -22.89 |
| ANISO-Polar | Rank4 | 5.974 | 7.841 | 8.096  | 90.07    | 115.21  | 90.08    | 0.42               | -23.07 |
| ANTCEN01    |       |       |       |        |          |         |          |                    |        |
|             | Exp.  | 6.002 | 8.443 | 9.256  | 90.00    | 102.27  | 90.00    | -                  | -      |
| NON-Polar   | Rank2 | 6.138 | 8.067 | 9.470  | 90.00    | 102.84  | 90.00    | 0.50               | -28.90 |
| ISO-Polar   | Rank3 | 6.087 | 8.108 | 9.463  | 90.00    | 102.82  | 90.00    | 0.45               | -30.29 |
| ANISO-Polar | Rank2 | 6.049 | 8.140 | 9.500  | 90.14    | 103.18  | 90.11    | 0.40               | -30.58 |
| TETCEN      |       |       |       |        |          |         |          |                    |        |
|             | Exp.  | 6.030 | 7.900 | 12.699 | 101.68   | 98.65   | 93.70    | -                  | -      |
| NON-Polar   | Rank1 | 6.069 | 7.495 | 12.926 | 104.01   | 96.80   | 93.25    | 0.60               | -33.63 |
| ISO-Polar   | Rank1 | 6.001 | 7.538 | 12.984 | 104.56   | 96.94   | 93.08    | 0.57               | -35.74 |
| ANISO-Polar | Rank1 | 5.967 | 7.586 | 12.990 | 104.70   | 97.09   | 92.94    | 0.53               | -36.32 |
| PENCEN      |       |       |       |        |          |         |          |                    |        |
|             | Exp.  | 6.060 | 7.900 | 14.884 | 96.74    | 100.54  | 94.20    | -                  | -      |
| NON-Polar   | Rank1 | 6.085 | 7.476 | 15.166 | 97.73    | 99.92   | 93.28    | 0.81               | -44.06 |
| ISO-Polar   | Rank1 | 6.018 | 7.529 | 15.199 | 97.88    | 100.26  | 93.14    | 0.73               | -46.49 |
| ANISO-Polar | Rank1 | 6.002 | 7.760 | 14.721 | 96.49    | 98.75   | 93.77    | 0.28               | -46.95 |

**Table S.3. The distributed atomic polarizability tensors under the molecular standard coordinates. The unit of atomic polarizability  $\alpha$  is in  $4\pi\epsilon_0\text{\AA}^3$ .**

| Type               | $\alpha_{xx}$                                                                     | $\alpha_{xy}$ | $\alpha_{xz}$ | $\alpha_{yz}$ | $\alpha_{yy}$ | $\alpha_{zz}$ | $\alpha_{iso}^{num}$ | $\alpha_{AMOEBA}$ |       |
|--------------------|-----------------------------------------------------------------------------------|---------------|---------------|---------------|---------------|---------------|----------------------|-------------------|-------|
| <b>naphthalene</b> | 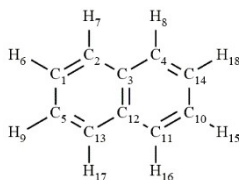 |               |               |               |               |               |                      |                   |       |
|                    | 1-C                                                                               | 1.711         | -0.248        | 0.000         | 0.000         | 1.422         | 0.866                | 1.333             | 1.750 |
|                    | 2-C                                                                               | 2.273         | 0.050         | 0.000         | 0.000         | 1.154         | 0.829                | 1.419             | 1.750 |
|                    | 3-C                                                                               | 2.366         | 0.005         | 0.000         | 0.000         | 1.561         | 0.585                | 1.504             | 1.750 |
|                    | 4-C                                                                               | 2.273         | -0.050        | 0.000         | 0.000         | 1.154         | 0.829                | 1.419             | 1.750 |
|                    | 5-C                                                                               | 1.711         | 0.248         | 0.000         | 0.000         | 1.422         | 0.866                | 1.332             | 1.750 |
|                    | 6-H                                                                               | 0.722         | 0.290         | 0.000         | 0.000         | 0.288         | 0.142                | 0.384             | 0.696 |
|                    | 7-H                                                                               | 0.147         | 0.073         | 0.000         | 0.000         | 0.741         | 0.140                | 0.343             | 0.696 |
|                    | 8-H                                                                               | 0.147         | -0.073        | 0.000         | 0.000         | 0.741         | 0.140                | 0.343             | 0.696 |
|                    | 9-H                                                                               | 0.722         | -0.290        | 0.000         | 0.000         | 0.288         | 0.142                | 0.384             | 0.696 |
|                    | 10-C                                                                              | 1.711         | -0.248        | 0.000         | 0.000         | 1.422         | 0.866                | 1.333             | 1.750 |
|                    | 11-C                                                                              | 2.273         | 0.050         | 0.000         | 0.000         | 1.154         | 0.829                | 1.419             | 1.750 |
|                    | 12-C                                                                              | 2.366         | 0.005         | 0.000         | 0.000         | 1.561         | 0.585                | 1.504             | 1.750 |
|                    | 13-C                                                                              | 2.273         | -0.050        | 0.000         | 0.000         | 1.154         | 0.829                | 1.419             | 1.750 |
|                    | 14-C                                                                              | 1.711         | 0.248         | 0.000         | 0.000         | 1.422         | 0.866                | 1.332             | 1.750 |
|                    | 15-H                                                                              | 0.722         | 0.290         | 0.000         | 0.000         | 0.288         | 0.142                | 0.384             | 0.696 |
|                    | 16-H                                                                              | 0.147         | 0.073         | 0.000         | 0.000         | 0.741         | 0.140                | 0.343             | 0.696 |
|                    | 17-H                                                                              | 0.147         | -0.073        | 0.000         | 0.000         | 0.741         | 0.140                | 0.343             | 0.696 |
|                    | 18-H                                                                              | 0.722         | -0.290        | 0.000         | 0.000         | 0.288         | 0.142                | 0.384             | 0.696 |
| $\sum \alpha$      | 24.144                                                                            | 0.010         | 0.000         | 0.000         | 17.542        | 9.078         | 16.922               | -                 |       |

|                   |                                                                                     |       |        |       |       |       |       |       |       |
|-------------------|-------------------------------------------------------------------------------------|-------|--------|-------|-------|-------|-------|-------|-------|
| <b>anthracene</b> | 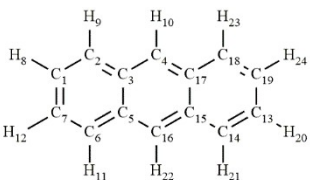 |       |        |       |       |       |       |       |       |
|                   | 1-C                                                                                 | 1.992 | -0.289 | 0.000 | 0.000 | 1.352 | 0.861 | 1.402 | 1.750 |
|                   | 2-C                                                                                 | 2.704 | 0.087  | 0.000 | 0.000 | 1.147 | 0.823 | 1.558 | 1.750 |
|                   | 3-C                                                                                 | 3.031 | -0.065 | 0.000 | 0.000 | 1.536 | 0.579 | 1.715 | 1.750 |

|                 |        |        |       |       |        |        |        |       |
|-----------------|--------|--------|-------|-------|--------|--------|--------|-------|
| 4-C             | 3.177  | -0.001 | 0.000 | 0.000 | 1.098  | 0.771  | 1.682  | 1.750 |
| 5-C             | 3.031  | 0.065  | 0.000 | 0.000 | 1.536  | 0.579  | 1.715  | 1.750 |
| 6-C             | 2.704  | -0.087 | 0.000 | 0.000 | 1.147  | 0.823  | 1.558  | 1.750 |
| 7-C             | 1.992  | 0.289  | 0.000 | 0.000 | 1.352  | 0.861  | 1.402  | 1.750 |
| 8-H             | 0.805  | 0.306  | 0.000 | 0.000 | 0.280  | 0.142  | 0.409  | 0.696 |
| 9-H             | 0.156  | 0.116  | 0.000 | 0.000 | 0.729  | 0.140  | 0.342  | 0.696 |
| 10-H            | 0.133  | 0.000  | 0.000 | 0.000 | 0.716  | 0.138  | 0.329  | 0.696 |
| 11-H            | 0.156  | -0.116 | 0.000 | 0.000 | 0.729  | 0.140  | 0.342  | 0.696 |
| 12-H            | 0.805  | -0.306 | 0.000 | 0.000 | 0.280  | 0.142  | 0.409  | 0.696 |
| 13-C            | 1.992  | -0.289 | 0.000 | 0.000 | 1.352  | 0.861  | 1.402  | 1.750 |
| 14-C            | 2.704  | 0.087  | 0.000 | 0.000 | 1.147  | 0.823  | 1.558  | 1.750 |
| 15-C            | 3.031  | -0.065 | 0.000 | 0.000 | 1.536  | 0.579  | 1.715  | 1.750 |
| 16-C            | 3.177  | -0.001 | 0.000 | 0.000 | 1.098  | 0.771  | 1.682  | 1.750 |
| 17-C            | 3.031  | 0.065  | 0.000 | 0.000 | 1.536  | 0.579  | 1.715  | 1.750 |
| 18-C            | 2.704  | -0.087 | 0.000 | 0.000 | 1.147  | 0.823  | 1.558  | 1.750 |
| 19-C            | 1.992  | 0.289  | 0.000 | 0.000 | 1.352  | 0.861  | 1.402  | 1.750 |
| 20-H            | 0.805  | 0.306  | 0.000 | 0.000 | 0.280  | 0.142  | 0.409  | 0.409 |
| 21-H            | 0.156  | 0.116  | 0.000 | 0.000 | 0.729  | 0.140  | 0.342  | 0.696 |
| 22-H            | 0.133  | 0.000  | 0.000 | 0.000 | 0.716  | 0.138  | 0.329  | 0.696 |
| 23-H            | 0.156  | -0.116 | 0.000 | 0.000 | 0.729  | 0.140  | 0.342  | 0.696 |
| 24-H            | 0.805  | -0.306 | 0.000 | 0.000 | 0.280  | 0.142  | 0.409  | 0.696 |
| $\Sigma \alpha$ | 41.372 | -0.002 | 0.000 | 0.000 | 23.804 | 11.998 | 25.726 | -     |

tetracene

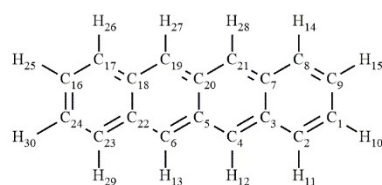

|     |       |        |       |       |       |       |       |       |
|-----|-------|--------|-------|-------|-------|-------|-------|-------|
| 1-C | 2.175 | -0.308 | 0.000 | 0.000 | 1.295 | 0.854 | 1.441 | 1.750 |
| 2-C | 2.979 | 0.113  | 0.000 | 0.000 | 1.135 | 0.815 | 1.643 | 1.750 |
| 3-C | 3.469 | -0.101 | 0.000 | 0.000 | 1.507 | 0.573 | 1.850 | 1.750 |
| 4-C | 3.752 | 0.028  | 0.000 | 0.000 | 1.095 | 0.760 | 1.869 | 1.750 |
| 5-C | 3.815 | 0.004  | 0.000 | 0.000 | 1.560 | 0.565 | 1.980 | 1.750 |
| 6-C | 3.752 | -0.028 | 0.000 | 0.000 | 1.095 | 0.760 | 1.869 | 1.750 |
| 7-C | 3.469 | 0.101  | 0.000 | 0.000 | 1.507 | 0.573 | 1.850 | 1.750 |
| 8-C | 2.979 | -0.113 | 0.000 | 0.000 | 1.135 | 0.815 | 1.643 | 1.750 |

|               |        |        |       |       |       |        |        |       |
|---------------|--------|--------|-------|-------|-------|--------|--------|-------|
| 9-C           | 2.175  | 0.308  | 0.000 | 0.000 | 1.295 | 0.854  | 1.441  | 1.750 |
| 10-H          | 0.870  | 0.318  | 0.000 | 0.000 | 0.275 | 0.143  | 0.429  | 0.696 |
| 11-H          | 0.165  | 0.144  | 0.000 | 0.000 | 0.721 | 0.140  | 0.342  | 0.696 |
| 12-H          | 0.139  | 0.040  | 0.000 | 0.000 | 0.707 | 0.138  | 0.328  | 0.696 |
| 13-H          | 0.139  | -0.040 | 0.000 | 0.000 | 0.707 | 0.138  | 0.328  | 0.696 |
| 14-H          | 0.165  | -0.144 | 0.000 | 0.000 | 0.721 | 0.140  | 0.342  | 0.696 |
| 15-H          | 0.870  | -0.318 | 0.000 | 0.000 | 0.275 | 0.143  | 0.429  | 0.696 |
| 16-C          | 2.175  | -0.308 | 0.000 | 0.000 | 1.295 | 0.854  | 1.441  | 1.750 |
| 17-C          | 2.979  | 0.113  | 0.000 | 0.000 | 1.135 | 0.815  | 1.643  | 1.750 |
| 18-C          | 3.469  | -0.101 | 0.000 | 0.000 | 1.507 | 0.573  | 1.850  | 1.750 |
| 19-C          | 3.752  | 0.028  | 0.000 | 0.000 | 1.095 | 0.760  | 1.869  | 1.750 |
| 20-C          | 3.815  | 0.004  | 0.000 | 0.000 | 1.560 | 0.565  | 1.980  | 1.750 |
| 21-C          | 3.752  | -0.028 | 0.000 | 0.000 | 1.095 | 0.760  | 1.869  | 1.750 |
| 22-C          | 3.469  | 0.101  | 0.000 | 0.000 | 1.507 | 0.573  | 1.850  | 1.750 |
| 23-C          | 2.979  | -0.113 | 0.000 | 0.000 | 1.135 | 0.815  | 1.643  | 1.750 |
| 24-C          | 2.175  | 0.308  | 0.000 | 0.000 | 1.295 | 0.854  | 1.441  | 1.750 |
| 25-H          | 0.870  | 0.318  | 0.000 | 0.000 | 0.275 | 0.143  | 0.429  | 0.696 |
| 26-H          | 0.165  | 0.144  | 0.000 | 0.000 | 0.721 | 0.140  | 0.342  | 0.696 |
| 27-H          | 0.139  | 0.040  | 0.000 | 0.000 | 0.707 | 0.138  | 0.328  | 0.696 |
| 28-H          | 0.139  | -0.040 | 0.000 | 0.000 | 0.707 | 0.138  | 0.328  | 0.696 |
| 29-H          | 0.165  | -0.144 | 0.000 | 0.000 | 0.721 | 0.140  | 0.342  | 0.696 |
| 30-H          | 0.870  | -0.318 | 0.000 | 0.000 | 0.275 | 0.143  | 0.429  | 0.696 |
| $\sum \alpha$ | 61.826 | 0.008  | 0.000 | 0.000 | 30.06 | 14.822 | 35.568 | -     |

pentacene

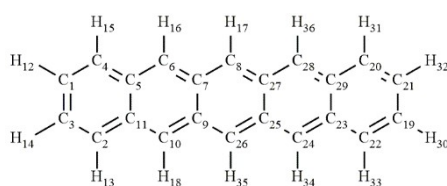

|     |       |        |       |       |       |       |       |       |
|-----|-------|--------|-------|-------|-------|-------|-------|-------|
| 1-C | 2.337 | -0.330 | 0.000 | 0.000 | 1.263 | 0.853 | 1.484 | 1.750 |
| 2-C | 3.225 | -0.133 | 0.000 | 0.000 | 1.133 | 0.812 | 1.723 | 1.750 |
| 3-C | 2.337 | 0.330  | 0.000 | 0.000 | 1.263 | 0.853 | 1.484 | 1.750 |
| 4-C | 3.225 | 0.133  | 0.000 | 0.000 | 1.133 | 0.812 | 1.723 | 1.750 |
| 5-C | 3.841 | -0.131 | 0.000 | 0.000 | 1.505 | 0.573 | 1.973 | 1.750 |
| 6-C | 4.219 | 0.045  | 0.000 | 0.000 | 1.103 | 0.756 | 2.026 | 1.750 |
| 7-C | 4.448 | -0.045 | 0.000 | 0.000 | 1.602 | 0.564 | 2.205 | 1.750 |

|               |        |        |       |       |        |        |        |       |
|---------------|--------|--------|-------|-------|--------|--------|--------|-------|
| 8-C           | 4.529  | 0.002  | 0.000 | 0.000 | 1.117  | 0.753  | 2.133  | 1.750 |
| 9-C           | 4.448  | 0.045  | 0.000 | 0.000 | 1.602  | 0.564  | 2.205  | 1.750 |
| 10-C          | 4.219  | -0.045 | 0.000 | 0.000 | 1.103  | 0.756  | 2.026  | 1.750 |
| 11-C          | 3.841  | 0.131  | 0.000 | 0.000 | 1.505  | 0.573  | 1.973  | 1.750 |
| 12-H          | 0.923  | 0.329  | 0.000 | 0.000 | 0.272  | 0.143  | 0.446  | 0.696 |
| 13-H          | 0.173  | -0.167 | 0.000 | 0.000 | 0.716  | 0.140  | 0.343  | 0.696 |
| 14-H          | 0.923  | -0.329 | 0.000 | 0.000 | 0.272  | 0.143  | 0.446  | 0.696 |
| 15-H          | 0.173  | 0.167  | 0.000 | 0.000 | 0.716  | 0.140  | 0.343  | 0.696 |
| 16-H          | 0.145  | 0.069  | 0.000 | 0.000 | 0.703  | 0.137  | 0.328  | 0.696 |
| 17-H          | 0.142  | 0.000  | 0.000 | 0.000 | 0.703  | 0.137  | 0.327  | 0.696 |
| 18-H          | 0.145  | -0.069 | 0.000 | 0.000 | 0.703  | 0.137  | 0.328  | 0.696 |
| 19-C          | 2.337  | -0.330 | 0.000 | 0.000 | 1.263  | 0.853  | 1.484  | 1.750 |
| 20-C          | 3.225  | -0.133 | 0.000 | 0.000 | 1.133  | 0.812  | 1.723  | 1.750 |
| 21-C          | 2.337  | 0.330  | 0.000 | 0.000 | 1.263  | 0.853  | 1.484  | 1.750 |
| 22-C          | 3.225  | 0.133  | 0.000 | 0.000 | 1.133  | 0.812  | 1.723  | 1.750 |
| 23-C          | 3.841  | -0.131 | 0.000 | 0.000 | 1.505  | 0.573  | 1.973  | 1.750 |
| 24-C          | 4.219  | 0.045  | 0.000 | 0.000 | 1.103  | 0.756  | 2.026  | 1.750 |
| 25-C          | 4.448  | -0.045 | 0.000 | 0.000 | 1.602  | 0.564  | 2.205  | 1.750 |
| 26-C          | 4.529  | 0.002  | 0.000 | 0.000 | 1.117  | 0.753  | 2.133  | 1.750 |
| 27-C          | 4.448  | 0.045  | 0.000 | 0.000 | 1.602  | 0.564  | 2.205  | 1.750 |
| 28-C          | 4.219  | -0.045 | 0.000 | 0.000 | 1.103  | 0.756  | 2.026  | 1.750 |
| 29-C          | 3.841  | 0.131  | 0.000 | 0.000 | 1.505  | 0.573  | 1.973  | 1.750 |
| 30-H          | 0.923  | 0.329  | 0.000 | 0.000 | 0.272  | 0.143  | 0.446  | 0.696 |
| 31-H          | 0.173  | -0.167 | 0.000 | 0.000 | 0.716  | 0.140  | 0.343  | 0.696 |
| 32-H          | 0.923  | -0.329 | 0.000 | 0.000 | 0.272  | 0.143  | 0.446  | 0.696 |
| 33-H          | 0.173  | 0.167  | 0.000 | 0.000 | 0.716  | 0.140  | 0.343  | 0.696 |
| 34-H          | 0.145  | 0.069  | 0.000 | 0.000 | 0.703  | 0.137  | 0.328  | 0.696 |
| 35-H          | 0.142  | 0.000  | 0.000 | 0.000 | 0.703  | 0.137  | 0.327  | 0.696 |
| 36-H          | 0.145  | -0.069 | 0.000 | 0.000 | 0.703  | 0.137  | 0.328  | 0.696 |
| $\sum \alpha$ | 86.586 | 0.004  | 0.000 | 0.000 | 36.828 | 17.692 | 47.032 | -     |

**Table S.4. Energy decomposition analysis on the basis of the optimized experimental crystals using NON-Polar, ISO-Polar and ANISO-Polar models. The unit of energy is in kcal mol<sup>-1</sup>.**

| Energy terms | NON-Polar | ISO-Polar | ANISO-Polar |
|--------------|-----------|-----------|-------------|
| naphthalene  |           |           |             |

|                           |          |          |          |
|---------------------------|----------|----------|----------|
| Total Potential           | -21.8597 | -22.8852 | -23.0695 |
| Bond stretching           | 0.1432   | 0.1399   | 0.1380   |
| Angle bending             | 0.0236   | 0.0270   | 0.0289   |
| Stretch-bend              | 0.0008   | 0.0010   | 0.0010   |
| Out-of-plane bend         | 0.0003   | 0.0003   | 0.0003   |
| Torsional angle           | 0.0055   | 0.0069   | 0.0070   |
| vdW interaction           | -20.8278 | -20.7629 | -20.7192 |
| Electrostatic interaction | -1.2053  | -1.2453  | -1.2691  |
| Polarization              | -        | -1.0520  | -1.2564  |
| anthracene                |          |          |          |
| Total Potential           | -27.6049 | -28.9887 | -29.2703 |
| Bond stretching           | 0.2389   | 0.2357   | 0.2338   |
| Angle bending             | 0.0292   | 0.0338   | 0.0375   |
| Stretch-bend              | 0.0010   | 0.0012   | 0.0012   |
| Out-of-plane bend         | 0.0012   | 0.0012   | 0.0014   |
| Torsional angle           | 0.0156   | 0.0180   | 0.0177   |
| vdW interaction           | -27.3519 | -27.2061 | -27.0755 |
| Electrostatic interaction | -0.5389  | -0.6489  | -0.7272  |
| Polarization              | -        | -1.4235  | -1.7592  |
| tetracene                 |          |          |          |
| Total Potential           | -33.6150 | -35.7333 | -36.3028 |
| Bond stretching           | 0.3616   | 0.3561   | 0.3504   |
| Angle bending             | 0.0504   | 0.0532   | 0.0516   |
| Stretch-bend              | 0.0029   | 0.0031   | 0.0029   |
| Out-of-plane bend         | 0.0011   | 0.0012   | 0.0011   |
| Torsional angle           | 0.0098   | 0.0094   | 0.0092   |
| vdW interaction           | -34.1462 | -33.8003 | -33.5814 |
| Electrostatic interaction | -0.1054  | -0.1622  | -0.3038  |
| Polarization              | -        | -2.1938  | -2.8329  |
| pentacene                 |          |          |          |
| Total Potential           | -44.3779 | -46.8123 | -47.2640 |
| Bond stretching           | 0.4191   | 0.4136   | 0.4056   |
| Angle bending             | 0.0568   | 0.0594   | 0.0539   |
| Stretch-bend              | 0.0030   | 0.0033   | 0.0024   |
| Out-of-plane bend         | 0.0019   | 0.0021   | 0.0012   |
| Torsional angle           | 0.0148   | 0.0142   | 0.0100   |
| vdW interaction           | -41.7130 | -41.3075 | -41.0615 |
| Electrostatic interaction | -3.1605  | -3.4774  | -3.5743  |
| Polarization              | -        | -2.5198  | -3.1013  |

**Table S.5** Molecular polarizability of naphthalene and anthracene calculated from different density functionals coupled with 6-311+G(d,p) basis set. (The unit of polarizability  $\alpha$  is in  $4\pi\epsilon_0\text{\AA}^3$ )

|                 | naphthalene   |               |               |                |       | anthracene    |               |               |                |       |
|-----------------|---------------|---------------|---------------|----------------|-------|---------------|---------------|---------------|----------------|-------|
|                 | $\alpha_{xx}$ | $\alpha_{yy}$ | $\alpha_{zz}$ | $\alpha_{iso}$ | $k$   | $\alpha_{xx}$ | $\alpha_{yy}$ | $\alpha_{zz}$ | $\alpha_{iso}$ | $k$   |
| PBE             | 25.16         | 18.13         | 9.17          | 17.49          | 0.265 | 43.96         | 24.56         | 11.98         | 26.83          | 0.347 |
| M06             | 24.80         | 17.86         | 9.22          | 17.29          | 0.261 | 42.85         | 24.27         | 12.21         | 26.44          | 0.337 |
| M06-L           | 24.42         | 17.53         | 8.78          | 16.91          | 0.268 | 42.61         | 23.79         | 11.65         | 26.02          | 0.346 |
| CAM-B3LYP       | 24.14         | 17.54         | 9.08          | 16.92          | 0.258 | 41.37         | 23.80         | 12.00         | 25.72          | 0.332 |
| $\omega$ B97X-D | 24.08         | 17.54         | 9.06          | 16.90          | 0.258 | 41.17         | 23.80         | 12.02         | 25.66          | 0.330 |
| B3LYP           | 24.74         | 17.84         | 9.15          | 17.24          | 0.262 | 42.85         | 24.17         | 12.09         | 26.37          | 0.339 |
| B2PLYP          | 24.44         | 17.7          | 9.16          | 17.10          | 0.259 | 42.15         | 23.92         | 12.12         | 26.06          | 0.335 |
